# Supplementary material for: Multiple Myeloma Patients Undergoing Carfilzomib: Development and Validation of a Risk Score for Cardiovascular Adverse Events Prediction
Source: PubMed Central journal article supplement (PMC8036868; doi:10.3390/cancers13071631), 2021-04-01
Supplement: cancers-13-01631-s001.pdf [file cancers-13-01631-s001.pdf]

Article

# Multiple Myeloma Patients Undergoing Carfilzomib: Development and Validation of a Risk Score for Cardiovascular Adverse Events Prediction

Anna Astarita <sup>1,\*</sup>, Giulia Mingrone <sup>1</sup>, Lorenzo Airale <sup>1</sup>, Fabrizio Vallelonga <sup>1</sup>, Michele Covella <sup>1</sup>, Cinzia Catarinella <sup>1</sup>, Marco Cesareo <sup>1</sup>, Giulia Bruno <sup>1</sup>, Dario Leone <sup>1</sup>, Carlo Giordana <sup>1</sup>, Giusy Cetani <sup>2</sup>, Marco Salvini <sup>2</sup>, Francesca Gay <sup>2</sup>, Sara Bringhen <sup>2</sup>, Franco Rabbia <sup>1</sup>, Franco Veglio <sup>1</sup> and Alberto Milan <sup>1</sup>

- <sup>1</sup> Hypertension Unit, Department of Medical Sciences, Division of Internal Medicine, AO "Città della Salute e della Scienza" University Hospital, Turin, 10126, Italy; giulia.mingrone@edu.unito.it (G.M.); lorenzo.airale@unito.it (L.A.); fabrizio.vallelonga@unito.it (F.Vallelonga); mcovella@ausl.vda.it (M.Covella); cinzia.catarinella@edu.unito.it (C.C.); marcoriccardo.cesareo@unito.it (M.Cesareo); giulia.bruno87@gmail.com (G.B.); dgleone@live.it (D.L.); carlo.giordana@edu.unito.it (C.G.); franco.rabbia@libero.it (F.R.); franco.veglia@unito.it (F.Veglio); alberto.milan@gmail.com (A.M.)
- <sup>2</sup> Myeloma Unit, Department of Medical Sciences, Division of Hematology, AO "Città della Salute e della Scienza" University Hospital, Turin, 10126, Italy; g.cetani@gmail.com (G.C.); marcosalvini83@gmail.com (M.S.); francesca.gay@unito.it (F.G.); sarabringhen@yahoo.com (S.B.)
- \* Correspondence: anna.astarita@unito.it. Tel.: 011-6336959

**Citation:** Astarita, A.; Mingrone, G.; Airale, L.; Vallelonga, F.; Covella, M.; Catarinella, C.; Cesareo, M.; Bruno, G.; Leone, D.; Giordana, C.; et al. Multiple Myeloma Patients Undergoing Carfilzomib: Development and Validation of a Risk Score for Cardiovascular Adverse Events Prediction. *Cancers* **2021**, *13*, 1631. <https://doi.org/10.3390/cancers13071631>

## Supplementary Materials

Academic Editors: Nicola Amodio

Received: date

Accepted: date

Published: date

**Publisher's Note:** MDPI stays neutral with regard to jurisdictional claims in published maps and institutional affiliations.

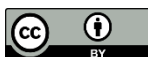

**Copyright:** © 2021 by the authors. Licensee MDPI, Basel, Switzerland. This article is an open access article distributed under the terms and conditions of the Creative Commons Attribution (CC BY) license (<http://creativecommons.org/licenses/by/4.0/>).

Table S1. Carfilzomib-based chemotherapeutic regimens.

| Protocol                                             | Chemotherapeutic Agents                                                                                                                          | Administration days<br>(Cycles of 28 days)                                               | Patients<br>No (%)* |
|------------------------------------------------------|--------------------------------------------------------------------------------------------------------------------------------------------------|------------------------------------------------------------------------------------------|---------------------|
| KD                                                   | - Carfilzomib 56mg/m <sup>2</sup> (20mg/m <sup>2</sup> D1 and D2 of C1)<br>- Dexamethasone 20 mg                                                 | - D1, 2, 8, 9, 15, 16<br>- D1, 2, 8, 9, 15, 16, 22, 23                                   | 32 (27.5)           |
| KRD                                                  | - Carfilzomib 27 mg/ m <sup>2</sup> (20mg/m <sup>2</sup> D1 and D2 of C1)<br>- Dexamethasone 40 mg<br>- Lenalidomide 25 mg                       | - D1, 2, 8, 9, 15, 16<br>(from C13: 1, 2, 15, 16)<br>- D1, 8, 15, 22<br>- From D1 to D21 | 53 (45.6)           |
| FORTE<br>Phase III study in<br>newly diagnosed<br>MM | <i>Study arm 1 (ASCT after 4 cycles):</i>                                                                                                        |                                                                                          |                     |
|                                                      | - Carfilzomib 36 mg/m <sup>2</sup> (20mg D1 and D2 of C1)<br>- Dexamethasone 40 mg<br>- Lenalidomide 25 mg                                       | - D1, 2, 8, 9, 15, 16<br>- D1, 2, 8, 9, 15, 16, 22, 23<br>- From D1 to D21               |                     |
|                                                      | <i>Study arm 2:</i>                                                                                                                              |                                                                                          |                     |
|                                                      | - Carfilzomib 36 mg/m <sup>2</sup> (20mg D1 and D2 of C1)<br>- Dexamethasone 40 mg<br>- Lenalidomide 25 mg                                       | - D1, 2, 8, 9, 15, 16<br>- D1, 2, 8, 9, 15, 16, 22, 23<br>- From D1 to D21               | 6 (5.2)             |
|                                                      | <i>Study arm 3 (ASCT after 4 cycles):</i>                                                                                                        |                                                                                          |                     |
|                                                      | - Carfilzomib 36 mg/m <sup>2</sup> (20mg D1 and D2 of C1)<br>- Dexamethasone 20 mg<br>- Cyclophosphamide 300 mg/m <sup>2</sup>                   | - D1, 2, 8, 9, 15, 16<br>- D1, 2, 8, 9, 15, 16, 22, 23<br>- D1, 8,15                     |                     |
| EMN07<br>Phase I/II study<br>in RRMM                 | - Carfilzomib 27/36/45/56 mg/m <sup>2</sup><br>(level -1/0/+1/+2) (20mg/m <sup>2</sup> D1 of C1)<br>- Dexamethasone 20 mg<br>- Pomalidomide 4 mg | - D1, 8, 15<br>- D1, 8, 15, 22<br>- From D1 to 21                                        | 13 (11.2)           |
| ARROW<br>RRMM<br>Phase III study in<br>RRMM          | <i>Study arm A:</i>                                                                                                                              |                                                                                          |                     |
|                                                      | - Carfilzomib 70 mg/m <sup>2</sup> (20mg/m <sup>2</sup> D1 of C1)<br>- Dexamethasone 40 mg                                                       | - D1, 8, 15<br>- D1, 8, 15 (22 from C1 to C9)                                            | 3 (2.6)             |
|                                                      | <i>Study arm B:</i>                                                                                                                              |                                                                                          |                     |
|                                                      | - Carfilzomib 27 mg/m <sup>2</sup> (20mg/m <sup>2</sup> D1 and D2 of C1)<br>- Dexamethasone 40 mg                                                | - D1, 2, 8, 9, 15, 16<br>- D1, 8, 15 (22 from C1 to C9)                                  | 3 (2.6)             |
| EMN11<br>Phase I/II study<br>in<br>RRMM              | (ASCT after 4 cycles)<br>- Carfilzomib 36 mg/m <sup>2</sup> (20mg/m <sup>2</sup> D1-D2 of C1)<br>- Dexamethasone 20 mg<br>- Pomalidomide 4 mg    | - D1, 2, 8, 9, 15, 16<br>- D1, 2, 8, 9, 15, 16<br>- From D1 to D21                       | 4 (3.5)             |

\* 2 patients were treated with unspecified Carfilzomib-based regimen.

**Table S2.** Carfilzomib cumulative dose and time at the first all-type CVAE, major CVAE, hypertension-related CVAE and at the end of the planning therapy.

| Event                           | Duration, median (SD), months | CFZ cumulative dose, median (SD), mg |
|---------------------------------|-------------------------------|--------------------------------------|
| First all-type CVAE             | 2.6 (0-49.6)                  | 11125,0 (27,8 -7951,7) *             |
| First Major CVAE                | 3.0 (0-21.2)                  | 1730,9 (29,32- 5118,8) †             |
| First Hypertension-related CVAE | 3.7 (0-49.7)                  | 860,0 (9,93-7951,7) ‡                |
| End of CFZ regimen              | 8.6 (0.1-52.8)                | 2781,9 (29,4-1323.5) §               |

Data available for: \*45 patients, †14 patients, ‡40 patients, §94 patients.

**Table S3.** Comparison between no-CVAEs and CVAEs groups: additional baseline parameters.

| Characteristics                                | No CVAEs<br>No=64 (53.4%) | No CVAEs<br>No=52 (46.6%) | p value |
|------------------------------------------------|---------------------------|---------------------------|---------|
| <i>Familiar CV risk factors</i>                |                           |                           |         |
| Ischaemic cardiopathy, No (%)                  | 17 (26.6)                 | 9 (17.3)                  | 0.235   |
| Ictus cerebri, No. (%)                         | 8 (12.5)                  | 5 (9.6)                   | 0.624   |
| Diabetes, No. (%)                              | 4 (6.3)                   | 2 (3.8)                   | 0.561   |
| Arterial Hypertension, No. (%)                 | 10 (15.6)                 | 5 (9.6)                   | 0.337   |
| <i>ECG</i>                                     |                           |                           |         |
| Right Bundle Block, No. (%)                    | 2 (3.6)                   | 3 (7.7)                   | 0.388   |
| Left Bundle Block, No. (%)                     | 1 (1.8)                   | 0 (0)                     | 0.397   |
| Right and Left Bundle Block, No. (%)           | 2 (3.6)                   | 2 (7.7)                   | 0.388   |
| LVH, No. (%)                                   | 6 (10.9)                  | 6 (15.4)                  | 0.522   |
| Abnormal ST segment, No. (%)                   | 6 (10.9)                  | 6 (15.4)                  | 0.522   |
| Abnormal ECG, No. (%)                          | 21 (38.9)                 | 17 (42.5)                 | 0.724   |
| <i>Echocardiography*</i>                       |                           |                           |         |
| LVH, No. (%)                                   | 8 (12.7)                  | 16 (30.8)                 | 0.018   |
| LV enlargement, No. (%)                        | 5 (9.3)                   | 4 (8.9)                   | 0.949   |
| Diastolic dysfunction, No. (%)                 | 1 (1.6)                   | 0(0)                      | 0.362   |
| LAVi enlargement, No. (%)                      | 4 (6.3)                   | 2 (3.8)                   | 0.548   |
| RV enlargement, No. (%)                        | 6 (12.2)                  | 5 (13.2)                  | 0.899   |
| TAPSE ≤ 17 mm, No. (%)                         | 2 (3.5)                   | 1 (2)                     | 0.637   |
| <i>Previous Oncological Therapies, No. (%)</i> |                           |                           |         |
| Anthracyclines                                 | 16 (25.8)                 | 15 (28.8)                 | 0.716   |
| Alkylating agents                              | 53 (85.5)                 | 38 (73.3)                 | 0.100   |
| Immunomodulating agents                        | 46 (74.2)                 | 40 (76.9)                 | 0.736   |
| Bortezomib                                     | 54 (87.1)                 | 43 (82.7)                 | 0.511   |
| All                                            | 12 (19.4)                 | 8 (15.4)                  | 0.579   |

Mean values estimated on: \*115 patients. LVH = left ventricular hypertrophy [computed according the Sokolow-Lyon Criteria: S wave in V1 plus the R wave in V5 or V6 > 35 mm]; LV enlargement = left ventricle enlargement [defined in case of LV diastolic diameter > 58 cm in males and > 52 cm in female]; LAVi = left atrial volume indexed to body surface area dilation [defined in case of LAVi volume ≥ 34 ml/m<sup>2</sup>]; RV dilation = right ventricle dilation [defined in case of RV basal diameter > 41 mm and/or RV mild diameter > 35 mm]; TAPSE = tricuspid annular plane excursion.
